# Supplementary material for: Sensitivity and Specificity of a New Vertical Flow Rapid Diagnostic Test for the Serodiagnosis of Human Leptospirosis
Source: PubMed Central journal article supplement (PMC3694835; doi:10.1371/journal.pntd.0002289), 2013-06-27

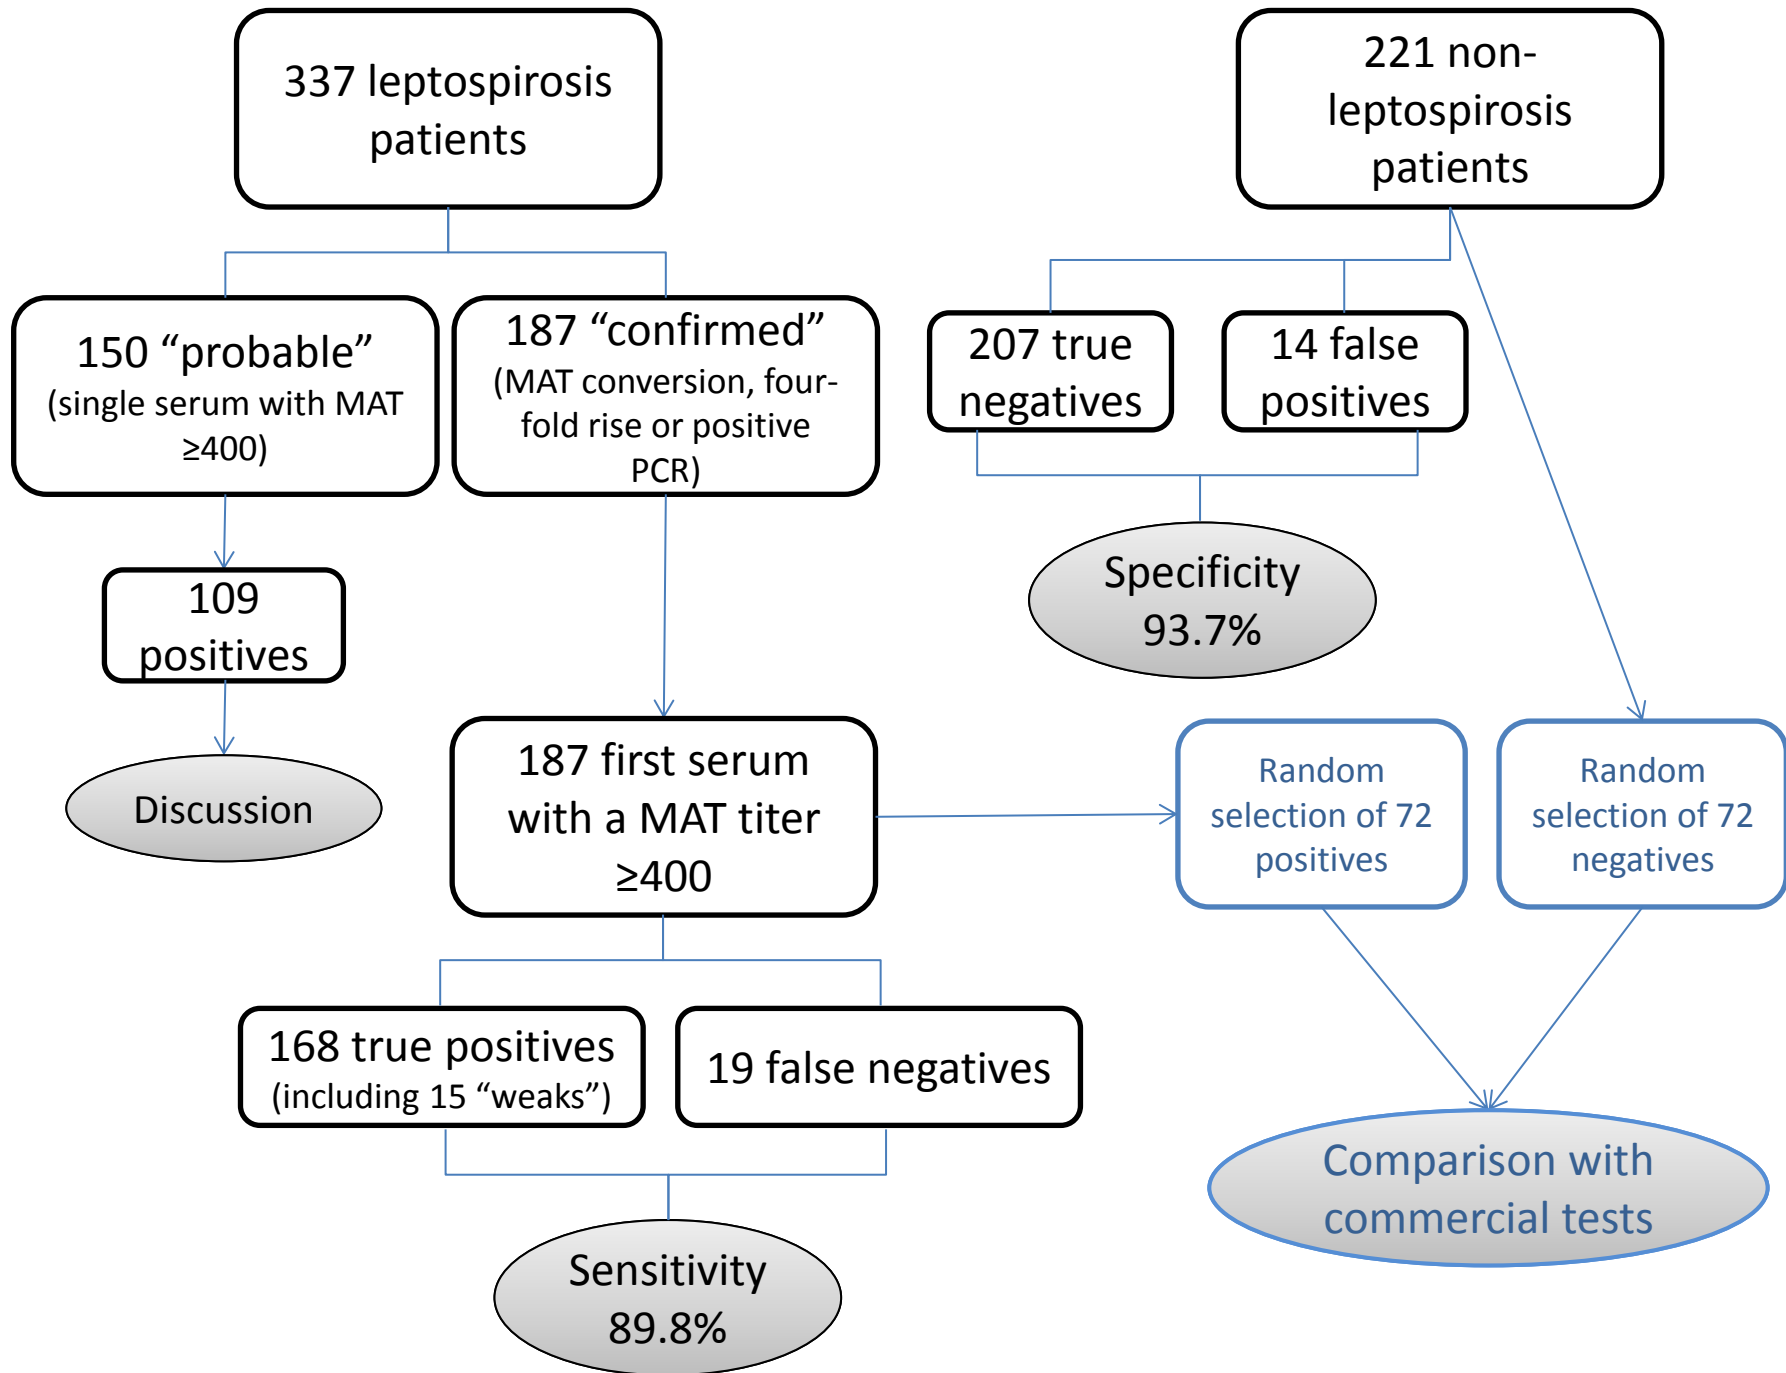

Supplement: pntd.0002289.s001.pdf [file pntd.0002289.s001.pdf]
